# Supplementary material
Source: PubMed Central journal article supplement (PMC6303509)

**Supplementary Appendix to:** Whole angiosperms *Wolffia columbiana* disperse by gut passage through wildfowl in South America.

G. G. Silva<sup>1</sup>; A. J. Green<sup>2</sup>; V. Weber<sup>1</sup>; P. Hoffmann<sup>1</sup>; Á. Lovas-Kiss<sup>3</sup>; C. Stenert<sup>1</sup>; L. Maltchik<sup>1</sup>

<sup>1</sup>Laboratory of Ecology and Conservation of Aquatic Ecosystems. Universidade do Vale do Rio dos Sinos (UNISINOS), Brazil.

<sup>2</sup>Department of Wetland Ecology, Estación Biológica de Doñana (EBD-CSIC), Spain.

<sup>3</sup>Department of Tisza Research, MTA Centre for Ecological Research-DRI, Hungary

**Appendix S1**

Date, total number of faeces collected, number of samples with *Wolffia columbiana* for each waterbird species from five wetlands, and the number of intact *Wolffia* recovered. The wetland numbers correspond to the locations given in appendix S2 and S3.

| Species                    | Number of samples | Samples with intact <i>Wolffia</i> | Number of intact <i>Wolffia</i> | Wetland | Sampling date |
|----------------------------|-------------------|------------------------------------|---------------------------------|---------|---------------|
| <i>Dendrocygna viduata</i> | 6                 |                                    |                                 | 2       | 21/10/2017    |
| <i>Dendrocygna viduata</i> | 10                |                                    |                                 | 1       | 18/11/2017    |
| <i>Dendrocygna viduata</i> | 7                 |                                    |                                 | 3       | 10/02/2018    |
| <i>Dendrocygna viduata</i> | 11                | 5                                  | 60                              | 4       | 25/04/2018    |
| <i>Dendrocygna viduata</i> | 15*               | 3                                  | 18                              | 5       | 27/07/2018    |
| <i>Coscoroba coscoroba</i> | 2                 |                                    |                                 | 2       | 24/08/2017    |
| <i>Coscoroba coscoroba</i> | 13                |                                    |                                 | 3       | 18/11/2017    |
| <i>Coscoroba coscoroba</i> | 7                 | 7                                  | 86                              | 4       | 25/04/2018    |

\* These were the samples used for the viability experiment

**Appendix S2**

Coordinates of wetlands where fresh faeces of *C. coscoroba* and *D. viduata* were collected in southern Brazil between August 2017 and June 2018.

| <b>Wetland</b> | <b>Lat°</b>   | <b>Long°</b>   |
|----------------|---------------|----------------|
| 1              | 33°36'33.20"S | 53°21'40.00" W |
| 2              | 33°38'13.10"S | 53°20'49.52" W |
| 3              | 33°37'37.95"S | 53°21'47.43" W |
| 4              | 33°35'57.50"S | 53°15'38.67" W |
| 5              | 33°33'25.45"S | 53°21'36.82"W  |

### Appendix S3

Map with location of the study area, in Santa Vitória do Palmar municipality, in the Coastal Plain of southern Brazil. Dots indicate the five wetlands where faeces of *C. coscoroba* and *D. viduata* were collected. Satellite image adapted from Google Earth.

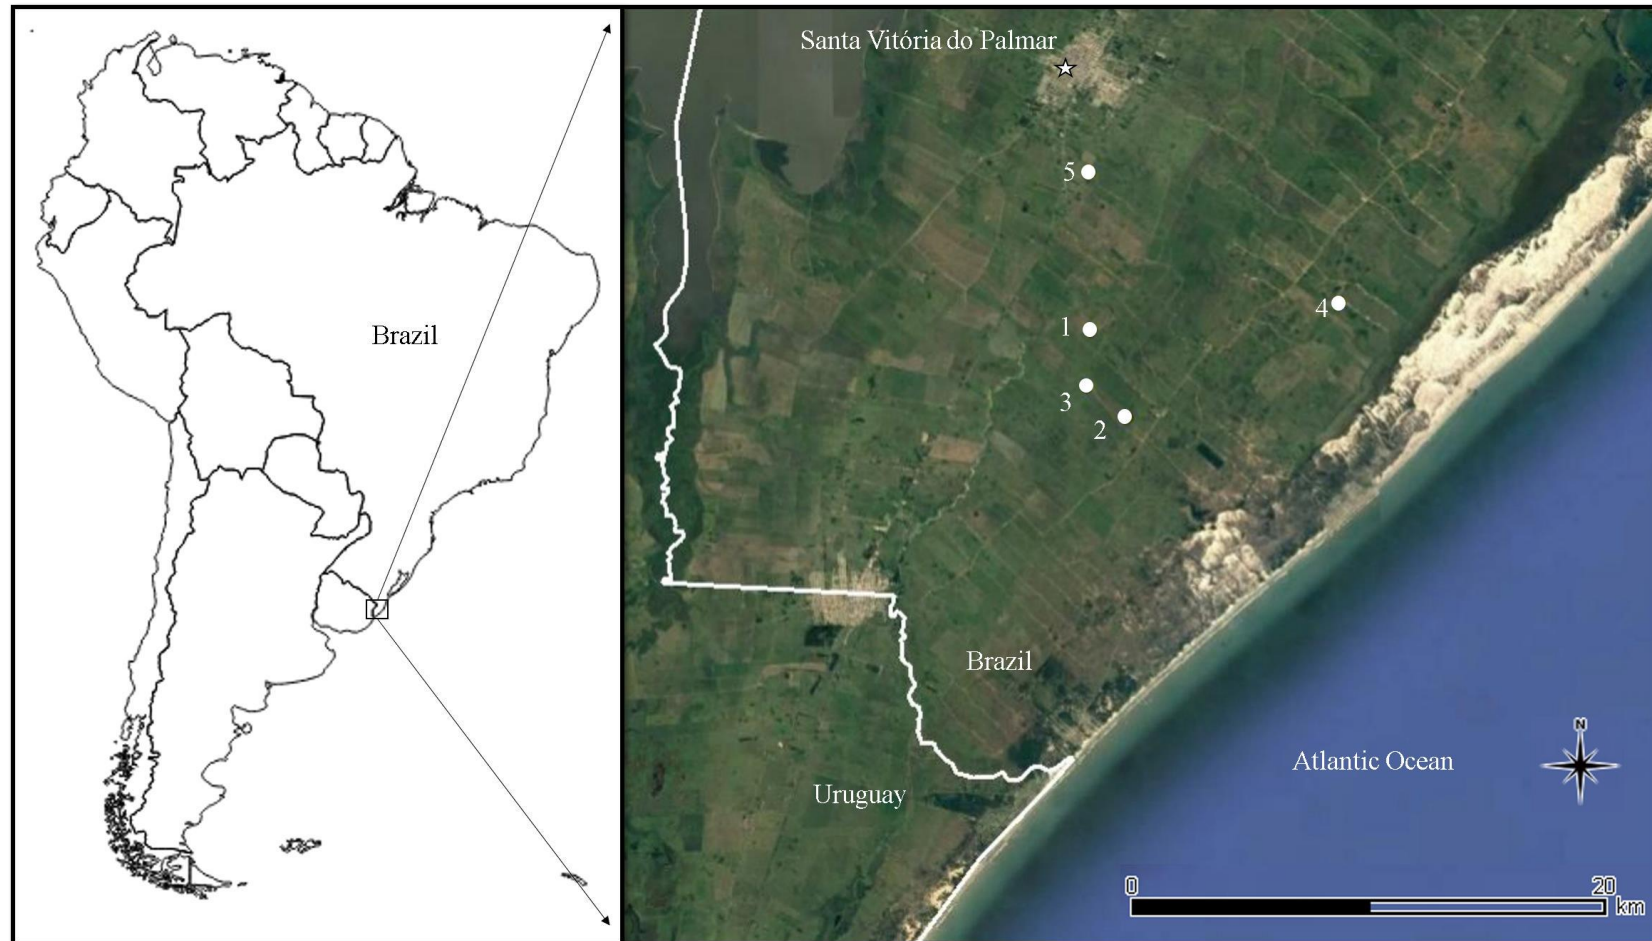

Supplement: rsbl20180703supp1.pdf [file rsbl20180703supp1.pdf]
